# Supplementary material for: Deciphering the Functional Composition of Fusogenic Liposomes
Source: PubMed Central journal article supplement (PMC5855568; doi:10.3390/ijms19020346), 2018-01-24
Supplement: ijms-19-00346-s001.pdf [file ijms-19-00346-s001.pdf]

Article

# Deciphering the Functional Composition of Fusogenic Liposomes

Rejhana Kolašinac, Christian Kleusch, Tobias Braun, Rudolf Merkel and Agnes Csiszár \*

Forschungszentrum Jülich GmbH, Institute of Complex Systems (ICS-7), Biomechanics, 52425 Jülich, Germany; r.kolasinac@fz-juelich.de (R.K.); Christian.Kleusch@nanotemper.de (C.K.); Tobi.braun@gmx.de (T.B.); r.merkel@fz-juelich.de (R.M.)

\* Correspondence: a.csiszar@fz-juelich.de; Tel.: +49-2461-6114-15

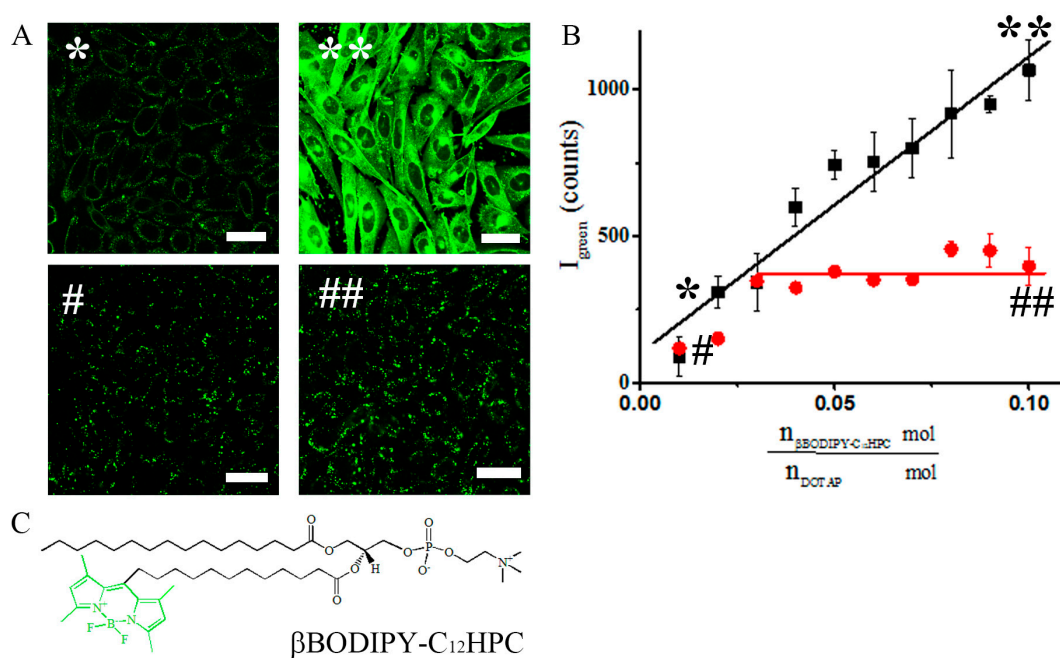

**Figure 1.** Importance of the aromatic component. **(A)** Fluorescence micrographs of CHO cells treated with liposomes containing  $\beta$ Bodipy-C<sub>12</sub>HPC as aromatic component in FLs at 0.01 (\*) and 0.1 (\*\*) mol/mol concentration as well as in ELs at the same concentrations (# and ##). Scale bars, 20  $\mu$ m. **(B)** Dependence of fusion efficiency on dye concentration in FLs (black squares) and in ELs (red circles). Measurement points with standard deviations are shown. Lines represent linear fits. **(C)** Molecular structure of the chain labeled lipid  $\beta$ Bodipy-C<sub>12</sub>HPC. The green color of the aromatic molecular part represents the spectral emission of the fluorophore.

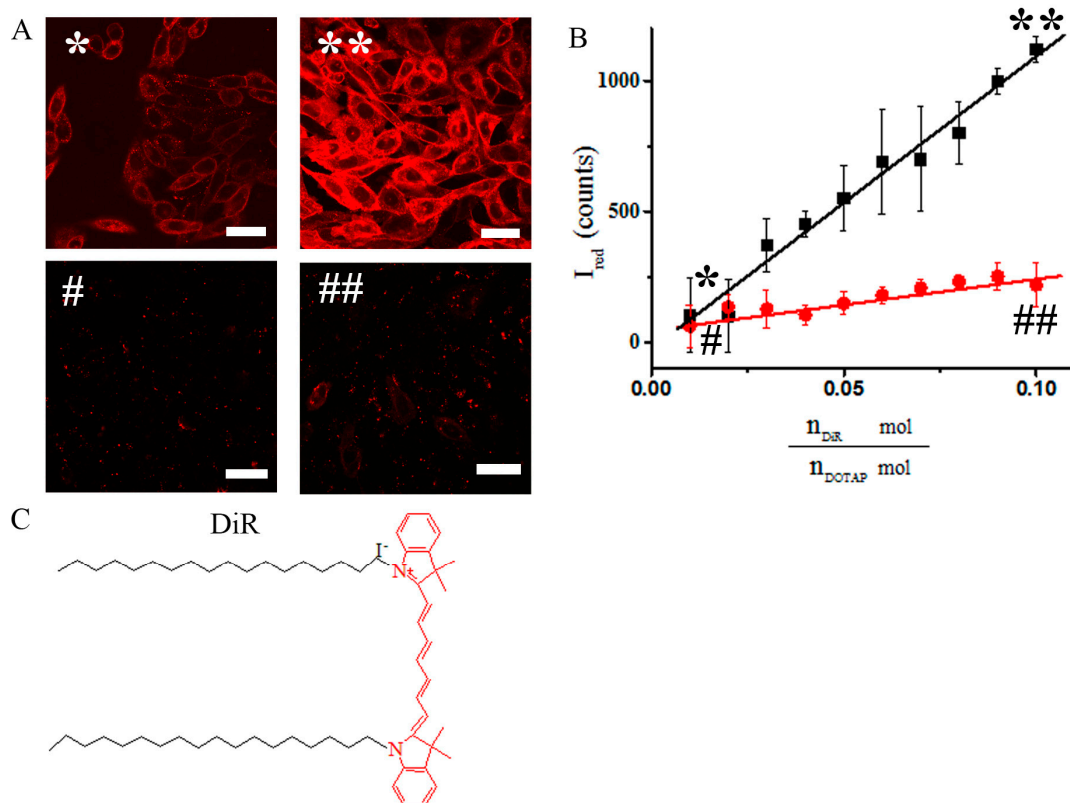

**Figure 2.** Importance of the aromatic component. (A) Fluorescence micrographs of CHO cells treated with liposomes containing DiR as aromatic component in FLs at 0.01 (\*) and 0.1 (\*\*) mol/mol concentration as well as in ELs at the same concentrations (# and ##). Scale bars, 20  $\mu\text{m}$ . (B) Dependence of fusion efficiency on dye concentration in FLs (black squares) and in ELs (red circles). Measurement points with standard deviations are shown. Lines represent linear fits. (C) Molecular structure of DiR. The red color of the aromatic molecular part represents the spectral emission of the fluorophore.

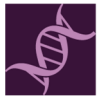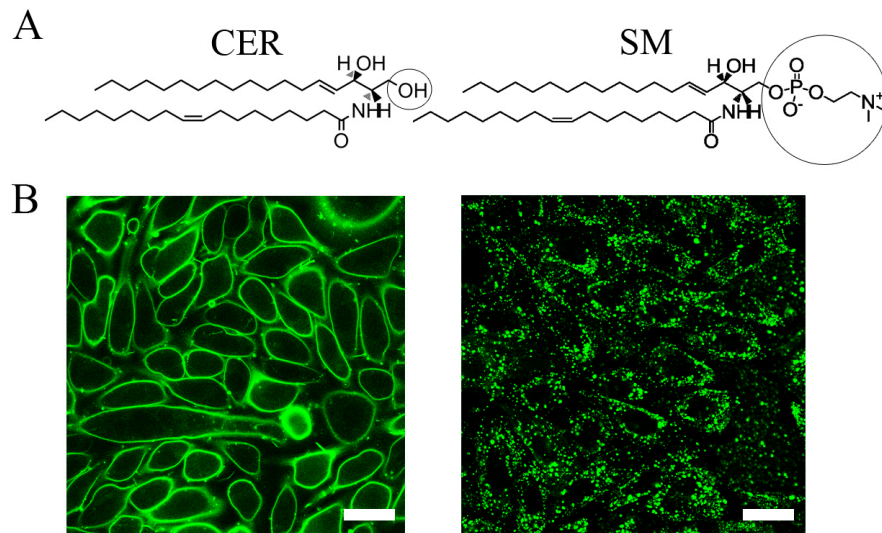

**Figure 3.** (A) Chemical structures of the neutral lipids N-oleoyl-D-erythro-sphingosine ceramide (CER) and N-oleoyl-D-erythro-sphingosylphosphorylcholine (SM). (B) Fluorescence micrographs of CHO cells treated with liposomes containing CER or SM as neutral lipid, DOTAP as cationic lipid, and BODIPY FL-DHPE as fluorescent component (1/1/0.1 mol/mol). Scale bars, 20  $\mu\text{m}$ .

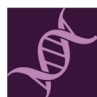

**Table 1.** Composition of all liposomes used in our experiments.

| Experiment | Neutral lipid | Cationic lipid | Aromatic component    | Non-aromatic component | Molar ratio |
|------------|---------------|----------------|-----------------------|------------------------|-------------|
| 1          | DOPE          | DODAP          | BODIPY FL-DHPE        | -                      | 1/1/0.1     |
| 1          | DOPE          | DOTAP          | BODIPY FL-DHPE        | -                      | 1/1/0.1     |
| 2          | DOPE          | DOTAP          | BODIPY FL-DHPE        | -                      | 2/0/0.1     |
| 2          | DOPE          | DOTAP          | BODIPY FL-DHPE        | -                      | 1/0.5/0.1   |
| 2          | DOPE          | DOTAP          | BODIPY FL-DHPE        | -                      | 1/1/0.1     |
| 2          | DOPE          | DOTAP          | BODIPY FL-DHPE        | -                      | 0/2/0.1     |
| 3          | DOPE          | DOTAP          | BODIPY FL-DHPE        | -                      | 1/1/0.1     |
| 3          | DOPE          | DOTMA          | BODIPY FL-DHPE        | -                      | 1/1/0.1     |
| 3          | DOPE          | DMTAP          | BODIPY FL-DHPE        | -                      | 1/1/0.1     |
| 3          | DOPE          | DOEPC          | BODIPY FL-DHPE        | -                      | 1/1/0.1     |
| 3          | DOPE          | DC-Cholesterol | BODIPY FL-DHPE        | -                      | 1/1/0.1     |
| 3          | DOPE          | MVL5           | BODIPY FL-DHPE        | -                      | 1/1/0.1     |
| 4          | DOPE          | DOTAP          | BODIPY FL-DHPE        | -                      | 1/1/0.01    |
| 4          | DOPE          | DOTAP          | BODIPY FL-DHPE        | -                      | 1/1/0.02    |
| 4          | DOPE          | DOTAP          | BODIPY FL-DHPE        | -                      | 1/1/0.03    |
| 4          | DOPE          | DOTAP          | BODIPY FL-DHPE        | -                      | 1/1/0.04    |
| 4          | DOPE          | DOTAP          | BODIPY FL-DHPE        | -                      | 1/1/0.05    |
| 4          | DOPE          | DOTAP          | BODIPY FL-DHPE        | -                      | 1/1/0.06    |
| 4          | DOPE          | DOTAP          | BODIPY FL-DHPE        | -                      | 1/1/0.07    |
| 4          | DOPE          | DOTAP          | BODIPY FL-DHPE        | -                      | 1/1/0.08    |
| 4          | DOPE          | DOTAP          | BODIPY FL-DHPE        | -                      | 1/1/0.09    |
| 4          | DOPE          | DOTAP          | BODIPY FL-DHPE        | -                      | 1/1/0.1     |
| 5          | DOPE          | DOTAP          | $\beta$ Bodipy-C12HPC | -                      | 1/1/0.01    |
| 5          | DOPE          | DOTAP          | $\beta$ Bodipy-C12HPC | -                      | 1/1/0.02    |
| 5          | DOPE          | DOTAP          | $\beta$ Bodipy-C12HPC | -                      | 1/1/0.03    |
| 5          | DOPE          | DOTAP          | $\beta$ Bodipy-C12HPC | -                      | 1/1/0.04    |
| 5          | DOPE          | DOTAP          | $\beta$ Bodipy-C12HPC | -                      | 1/1/0.05    |
| 5          | DOPE          | DOTAP          | $\beta$ Bodipy-C12HPC | -                      | 1/1/0.06    |
| 5          | DOPE          | DOTAP          | $\beta$ Bodipy-C12HPC | -                      | 1/1/0.07    |
| 5          | DOPE          | DOTAP          | $\beta$ Bodipy-C12HPC | -                      | 1/1/0.08    |
| 5          | DOPE          | DOTAP          | $\beta$ Bodipy-C12HPC | -                      | 1/1/0.09    |
| 5          | DOPE          | DOTAP          | $\beta$ Bodipy-C12HPC | -                      | 1/1/0.1     |
| 6          | DOPE          | DOTAP          | DiR                   | -                      | 1/1/0.01    |
| 6          | DOPE          | DOTAP          | DiR                   | -                      | 1/1/0.02    |
| 6          | DOPE          | DOTAP          | DiR                   | -                      | 1/1/0.03    |
| 6          | DOPE          | DOTAP          | DiR                   | -                      | 1/1/0.04    |
| 6          | DOPE          | DOTAP          | DiR                   | -                      | 1/1/0.05    |
| 6          | DOPE          | DOTAP          | DiR                   | -                      | 1/1/0.06    |
| 6          | DOPE          | DOTAP          | DiR                   | -                      | 1/1/0.07    |
| 6          | DOPE          | DOTAP          | DiR                   | -                      | 1/1/0.08    |
| 6          | DOPE          | DOTAP          | DiR                   | -                      | 1/1/0.09    |
| 6          | DOPE          | DOTAP          | DiR                   | -                      | 1/1/0.1     |
| 7          | DOPC          | DOTAP          | BODIPY FL-DHPE        | -                      | 1/1/0.01    |
| 7          | DOPC          | DOTAP          | BODIPY FL-DHPE        | -                      | 1/1/0.02    |
| 7          | DOPC          | DOTAP          | BODIPY FL-DHPE        | -                      | 1/1/0.03    |
| 7          | DOPC          | DOTAP          | BODIPY FL-DHPE        | -                      | 1/1/0.04    |
| 7          | DOPC          | DOTAP          | BODIPY FL-DHPE        | -                      | 1/1/0.05    |
| 7          | DOPC          | DOTAP          | BODIPY FL-DHPE        | -                      | 1/1/0.06    |
| 7          | DOPC          | DOTAP          | BODIPY FL-DHPE        | -                      | 1/1/0.07    |
| 7          | DOPC          | DOTAP          | BODIPY FL-DHPE        | -                      | 1/1/0.08    |
| 7          | DOPC          | DOTAP          | BODIPY FL-DHPE        | -                      | 1/1/0.09    |



|    |        |       |                                    |                  |              |
|----|--------|-------|------------------------------------|------------------|--------------|
| 7  | DOPC   | DOTAP | BODIPY FL-DHPE                     | -                | 1/1/0.1      |
| 8  | DOPC   | DOTAP | $\beta$ Bodipy-C <sub>12</sub> HPC | -                | 1/1/0.01     |
| 8  | DOPC   | DOTAP | $\beta$ Bodipy-C <sub>12</sub> HPC | -                | 1/1/0.02     |
| 8  | DOPC   | DOTAP | $\beta$ Bodipy-C <sub>12</sub> HPC | -                | 1/1/0.03     |
| 8  | DOPC   | DOTAP | $\beta$ Bodipy-C <sub>12</sub> HPC | -                | 1/1/0.04     |
| 8  | DOPC   | DOTAP | $\beta$ Bodipy-C <sub>12</sub> HPC | -                | 1/1/0.05     |
| 8  | DOPC   | DOTAP | $\beta$ Bodipy-C <sub>12</sub> HPC | -                | 1/1/0.06     |
| 8  | DOPC   | DOTAP | $\beta$ Bodipy-C <sub>12</sub> HPC | -                | 1/1/0.07     |
| 8  | DOPC   | DOTAP | $\beta$ Bodipy-C <sub>12</sub> HPC | -                | 1/1/0.08     |
| 8  | DOPC   | DOTAP | $\beta$ Bodipy-C <sub>12</sub> HPC | -                | 1/1/0.09     |
| 8  | DOPC   | DOTAP | $\beta$ Bodipy-C <sub>12</sub> HPC | -                | 1/1/0.1      |
| 9  | DOPC   | DOTAP | DiR                                | -                | 1/1/0.01     |
| 9  | DOPC   | DOTAP | DiR                                | -                | 1/1/0.02     |
| 9  | DOPC   | DOTAP | DiR                                | -                | 1/1/0.03     |
| 9  | DOPC   | DOTAP | DiR                                | -                | 1/1/0.04     |
| 9  | DOPC   | DOTAP | DiR                                | -                | 1/1/0.05     |
| 9  | DOPC   | DOTAP | DiR                                | -                | 1/1/0.06     |
| 9  | DOPC   | DOTAP | DiR                                | -                | 1/1/0.07     |
| 9  | DOPC   | DOTAP | DiR                                | -                | 1/1/0.08     |
| 9  | DOPC   | DOTAP | DiR                                | -                | 1/1/0.09     |
| 9  | DOPC   | DOTAP | DiR                                | -                | 1/1/0.1      |
| 10 | DOPE   | DOTAP | BODIPY FL-DHPE                     | DiR              | 1/1/0.02/0.1 |
| 10 | DOPE   | DOTAP | BODIPY FL-DHPE                     | Cholesterol      | 1/1/0.02/0.1 |
| 10 | DOPE   | DOTAP | BODIPY FL-DHPE                     | Biotinylcap-DOPE | 1/1/0.02/0.1 |
| 10 | DOPE   | DOTAP | BODIPY FL-DHPE                     | PEG2000-DOPE     | 1/1/0.02/0.1 |
| 11 | DMPE   | DOTAP | BODIPY FL-DHPE                     | -                | 1/1/0.1      |
| 11 | DPPE   | DOTAP | BODIPY FL-DHPE                     | -                | 1/1/0.1      |
| 11 | DPaPE  | DOTAP | BODIPY FL-DHPE                     | -                | 1/1/0.1      |
| 11 | DSPE   | DOTAP | BODIPY FL-DHPE                     | -                | 1/1/0.1      |
| 11 | DOPE   | DOTAP | BODIPY FL-DHPE                     | -                | 1/1/0.1      |
| 11 | LysoPE | DOTAP | BODIPY FL-DHPE                     | -                | 1/1/0.1      |
| 12 | DMPC   | DOTAP | BODIPY FL-DHPE                     | -                | 1/1/0.1      |
| 12 | DPPC   | DOTAP | BODIPY FL-DHPE                     | -                | 1/1/0.1      |
| 12 | DPaPC  | DOTAP | BODIPY FL-DHPE                     | -                | 1/1/0.1      |
| 12 | DSPC   | DOTAP | BODIPY FL-DHPE                     | -                | 1/1/0.1      |
| 12 | DOPC   | DOTAP | BODIPY FL-DHPE                     | -                | 1/1/0.1      |
| 12 | DLiPC  | DOTAP | BODIPY FL-DHPE                     | -                | 1/1/0.1      |
| 12 | DEPC   | DOTAP | BODIPY FL-DHPE                     | -                | 1/1/0.1      |
| 12 | LysoPC | DOTAP | BODIPY FL-DHPE                     | -                | 1/1/0.1      |
| 12 | SM     | DOTAP | BODIPY FL-DHPE                     | -                | 1/1/0.1      |
| 12 | CER    | DOTAP | BODIPY FL-DHPE                     | -                | 1/1/0.1      |

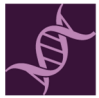

**Table 2.** Characteristics of liposomes containing non-aromatic molecules as third components and DOPE/DOTAP/BODIPY FL-DHPE (0.1/1/1/0.02 mol/mol). The aromatic BODIPY FL-DHPE was used below its critical fusogenic concentration. Fusion efficiency of liposomes with CHO cells, as well as liposomal zeta potential ( $\zeta$ ), and hydrodynamic size (d) are listed.

| <b>Lipids</b>    | <b>Fusion eff. (s.d.) (%)</b> | <b><math>\zeta</math> (s.d.) (mV)</b> | <b>d (s.d.) (nm)</b> |
|------------------|-------------------------------|---------------------------------------|----------------------|
| Biotinylcap-DOPE | 0 (0)                         | 59 (7)                                | 116 (29)             |
| PEG2000-DOPE     | 8 (2)                         | 64 (5)                                | 165 (31)             |
| Cholesterol      | 0 (0)                         | 65 (4)                                | 124 (19)             |
| DiR              | 90 (7)                        | 64 (3)                                | 165 (2)              |
